# Supplementary material for: Optimal Treatment of 6-Dimethylaminopurine Enhances the In Vivo Development of Canine Embryos by Rapid Initiation of DNA Synthesis
Source: MDPI journal article supplement (doi:10.3390/ijms22147757), 2021-07-20
Supplement: s1 [file s1]

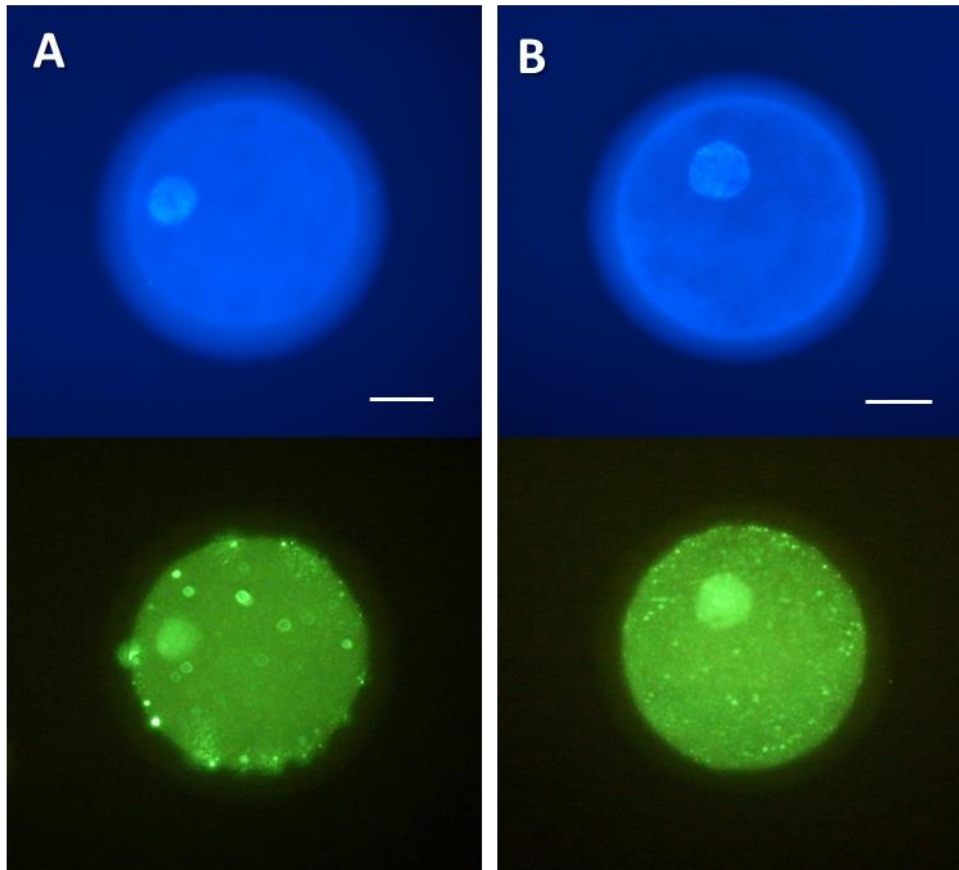

Supplementary Figure S1. BrdU incorporation by canine cloned embryos following oocyte activation. (A) DAPI staining (upper panel) and BrdU incorporation (lower panel) of embryos at 2 hpa in the DMAP-2h group. (B) DAPI staining (upper panel) and BrdU incorporation (lower panel) of embryos at 4 hpa in the DMAP-4h group. (scale bar = 40 mm).
